# Supplementary material for: Synthesis, structure, properties, and cytotoxicity of a (quinoline)RuCp+ complex
Source: Royal Society of Chemistry journal article supplement (doi:10.1039/d2dt03484k), 2022-12-23
Supplement: d2dt03484k1.pdf [file d2dt03484k1.pdf]

# Synthesis, Structure, Properties, and Cytotoxicity of a (Quinoline)RuCp<sup>+</sup> Complex

Zhilin Hou, Allison S. Vanecek, Jetze J. Tepe\*, and Aaron L. Odom\*

Michigan State University, Department of Chemistry, 578 S. Shaw Ln, East Lansing, MI 48824

odoma@msu.edu, tepe@msu.edu

## Supporting Information

### Table of Contents

|                                                                                                                                                         |    |
|---------------------------------------------------------------------------------------------------------------------------------------------------------|----|
| Modified Synthesis of {RuCp(NCMe) <sub>3</sub> } <sup>+</sup> PF <sub>6</sub> <sup>-</sup> .....                                                        | 2  |
| Stability of 1 in DMSO-d <sub>6</sub> /D <sub>2</sub> O .....                                                                                           | 3  |
| Stability of 1 in DMSO-d <sub>6</sub> .....                                                                                                             | 4  |
| Stability of 2 in DMSO-d <sub>6</sub> /D <sub>2</sub> O .....                                                                                           | 5  |
| Stability of {RuCp(NCMe) <sub>3</sub> } <sup>+</sup> PF <sub>6</sub> <sup>-</sup> in DMSO-d <sub>6</sub> .....                                          | 6  |
| Stability of {RuCp(NCMe) <sub>3</sub> } <sup>+</sup> PF <sub>6</sub> <sup>-</sup> in DMSO-d <sub>6</sub> /D <sub>2</sub> O .....                        | 7  |
| Measurement of the kinetics of quinoline replacement by DMSO-d <sub>6</sub> .....                                                                       | 8  |
| NMR Spectra .....                                                                                                                                       | 10 |
| (η <sup>6</sup> (C6)-3-cyclohexyl-2,5,7-trimethylquinoline)(η <sup>5</sup> -cyclopentadienyl)ruthenium(II)<br>hexafluorophosphate ( <b>1</b> ) .....    | 10 |
| <sup>1</sup> H NMR .....                                                                                                                                | 10 |
| <sup>13</sup> C NMR .....                                                                                                                               | 11 |
| <sup>19</sup> F NMR .....                                                                                                                               | 12 |
| (η <sup>6</sup> (C6)-3-(cyclohex-1-en-1-yl)-2-methylquinoline)(η <sup>5</sup> -cyclopentadienyl)ruthenium(II)<br>hexafluorophosphate ( <b>2</b> ) ..... | 13 |
| <sup>1</sup> H NMR .....                                                                                                                                | 13 |
| <sup>13</sup> C NMR .....                                                                                                                               | 14 |
| <sup>19</sup> F NMR .....                                                                                                                               | 15 |
| tris(dimethyl sulfoxide)(η <sup>5</sup> -cyclopentadienyl)ruthenium(II) hexafluorophosphate .....                                                       | 16 |

|                                               |    |
|-----------------------------------------------|----|
| <sup>1</sup> H NMR .....                      | 16 |
| <sup>13</sup> C NMR .....                     | 17 |
| <sup>19</sup> F NMR.....                      | 18 |
| Cytotoxicity – MC/CAR cells .....             | 19 |
| Cytotoxicity – RPMI 8226 cells .....          | 20 |
| 20S Proteasome Inhibitor Data for Quin1 ..... | 21 |
| 20S Proteasome Inhibitor Data for 1 .....     | 22 |
| 20S Proteasome Inhibitor Data for Quin2 ..... | 23 |
| 20S Proteasome Inhibitor Data for 2 .....     | 24 |
| Cellular Proteasome Activity Assay.....       | 25 |
| DNA Crosslinking Assay .....                  | 26 |
| Cited References.....                         | 26 |

### Modified Synthesis of {RuCp(NCMe)<sub>3</sub>}<sup>+</sup>PF<sub>6</sub><sup>-</sup>

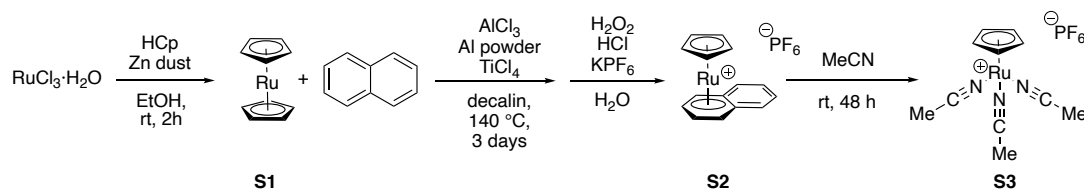

The procedure was adapted from a literature procedure.<sup>1</sup> Ruthenium trichloride hydrate (1g, 4.8 mmol) was dissolved in absolute ethanol (20 mL) in a 250 mL Schlenk flask with a stir bar. Freshly distilled cyclopentadiene (5 mL, 60 mmol) was added to the stirring solution. Then, zinc dust (3.1 g, 48 mmol) was added in 5 portions over 10 mins. The reaction mixture was stirred at room temperature for 2 h. The mixture was filtered on celite through a frit, and the solids were washed with 50 mL of hexanes. The filtrate was evaporated, and the resulting solid extracted with 50 mL of hexanes. The mixture in hexanes was passed through a plug of silica gel, and the plug was washed with hexanes until the filtrate was almost colorless. The solution was evaporated to afford ruthenocene (**S1**) as a grey solid (405 mg, 36%). <sup>1</sup>H NMR (CDCl<sub>3</sub>, 500 MHz, 21 °C): δ 4.55 (s, 10H). All characterization data was consistent with reported values.<sup>1</sup>

In a glovebox, a 100 mL Schlenk tube was charged with **S1** (400 mg, 1.7 mmol), naphthalene (2.2g, 17 mmol), AlCl<sub>3</sub> (230 mg, 1.7 mmol), Al powder (23 mg, 0.9 mmol), dry decalin (20 mL), and a stir bar. To the mixture was added TiCl<sub>4</sub> (95 µL, 0.9 mmol) dropwise. The Schlenk tube was sealed, taken out from

glovebox, and heated in a 140 °C silicon oil bath for 3 d. The mixture turned dark green over the course of the reaction. Then, the Schlenk tube was cooled to room temperature and a premade solution of water (30 g), 32% hydrogen peroxide (2.5 mL), and 30% HCl (2.5 mL) was added with stirring. The mixture turned red after addition. The aqueous layer was separated, and the organic layer was washed with water (3 × 30 mL). To the combined aqueous layers was added KPF<sub>6</sub> (460 mg, 2.5 mmol) resulting in the formation of a precipitate. The precipitate was extracted with dichloromethane (40 mL). Evaporation of the volatiles afforded the product {RuCp(η<sup>6</sup>-naphthalene)}<sup>+</sup>PF<sub>6</sub><sup>-</sup> (**S2**) as an orange solid (304 mg, 40%). <sup>1</sup>H NMR (acetone-d<sub>3</sub>, 500 MHz, 21 °C): δ 7.86 (dd, J = 6.6, 3.2 Hz, 2H), 7.67 (dd, J = 6.7, 3.2 Hz, 2H), 7.18 (dd, J = 4.3, 2.5 Hz, 2H), 6.41 (dd, J = 4.4, 2.4 Hz, 2H), 5.09 (s, 5H). Characterization data was consistent with reported values.<sup>1</sup>

In a glovebox, a 20 mL glass vial was charged with a stir bar, **S2** (300 mg, 0.7 mmol), acetonitrile (5 mL), and hexanes (5 mL). The mixture was stirred at room temperature for 24 h. The hexanes layer was decanted. Another portion of hexanes was added, and the mixture was stirred for 24 h. After decanting the hexanes layer, the acetonitrile solvent was removed in vacuo to afford {RuCp(NCMe)<sub>3</sub>}<sup>+</sup>PF<sub>6</sub><sup>-</sup> (**S3**) as a yellow solid (280 mg, 95%). <sup>1</sup>H NMR (CDCl<sub>3</sub>, 500 MHz, 21 °C): δ 4.21 (s, 5H), 2.41 (s, 9H). Characterization data was consistent with reported values.<sup>1</sup>

### Stability of **1** in DMSO-d<sub>6</sub>/D<sub>2</sub>O

In a 20 mL glass vial, **1** (1.2 mg) was dissolved in DMSO-d<sub>6</sub> (60 μL), which was then diluted with D<sub>2</sub>O (540 μL). The solution was mixed via pipet and transferred to an NMR tube. Proton NMR spectra were taken after 0, 24, 48, and 72 h. No appreciable change was observed in the spectra over this time period.

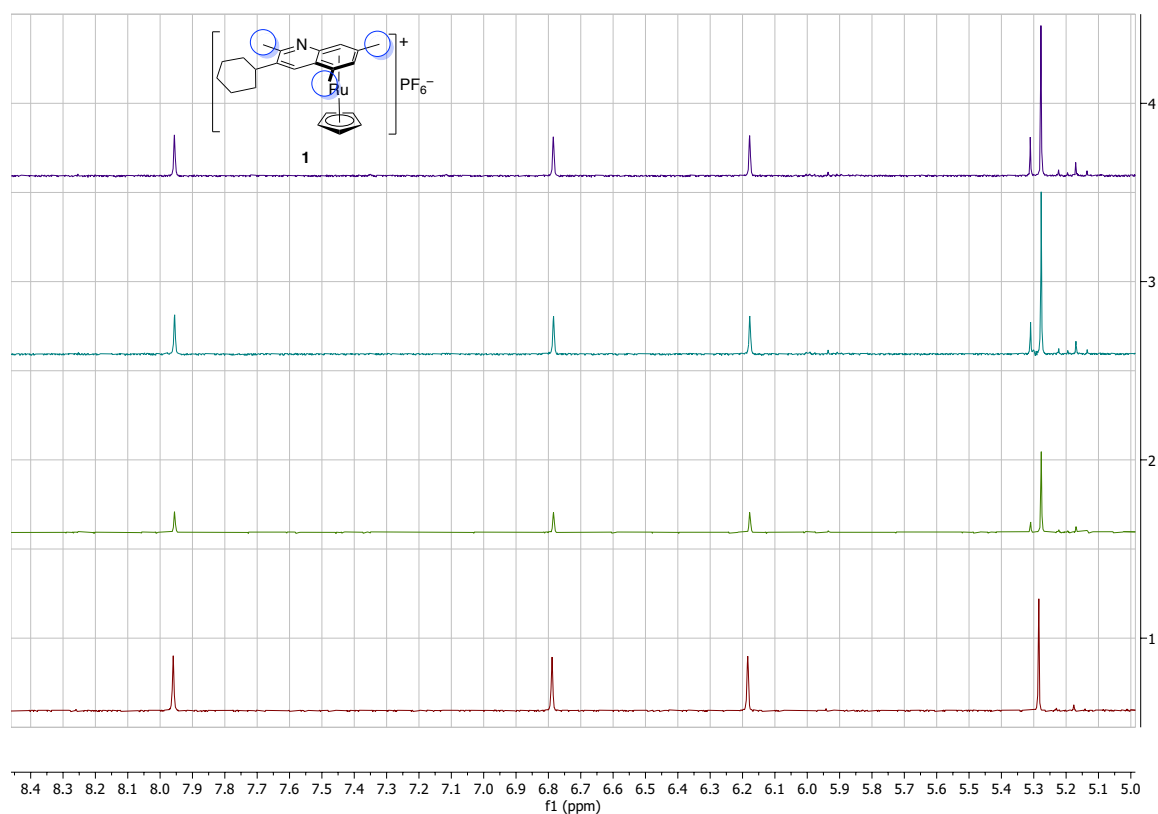

**Fig. 1.** From bottom to top,  $^1\text{H}$  NMR spectra of **1** (aromatic region) in 10%  $\text{DMSO-d}_6/\text{D}_2\text{O}$  after 0, 24, 48, and 72 h.

#### Stability of **1** in $\text{DMSO-d}_6$

In a 20 mL glass vial, **1** (1.3 mg) was dissolved in  $\text{DMSO-d}_6$  (600  $\mu\text{L}$ ). The solution was mixed via pipet and transferred to an NMR tube. Proton NMR spectra were taken  $\text{d}_6$  after 0, 48, and 72 h.

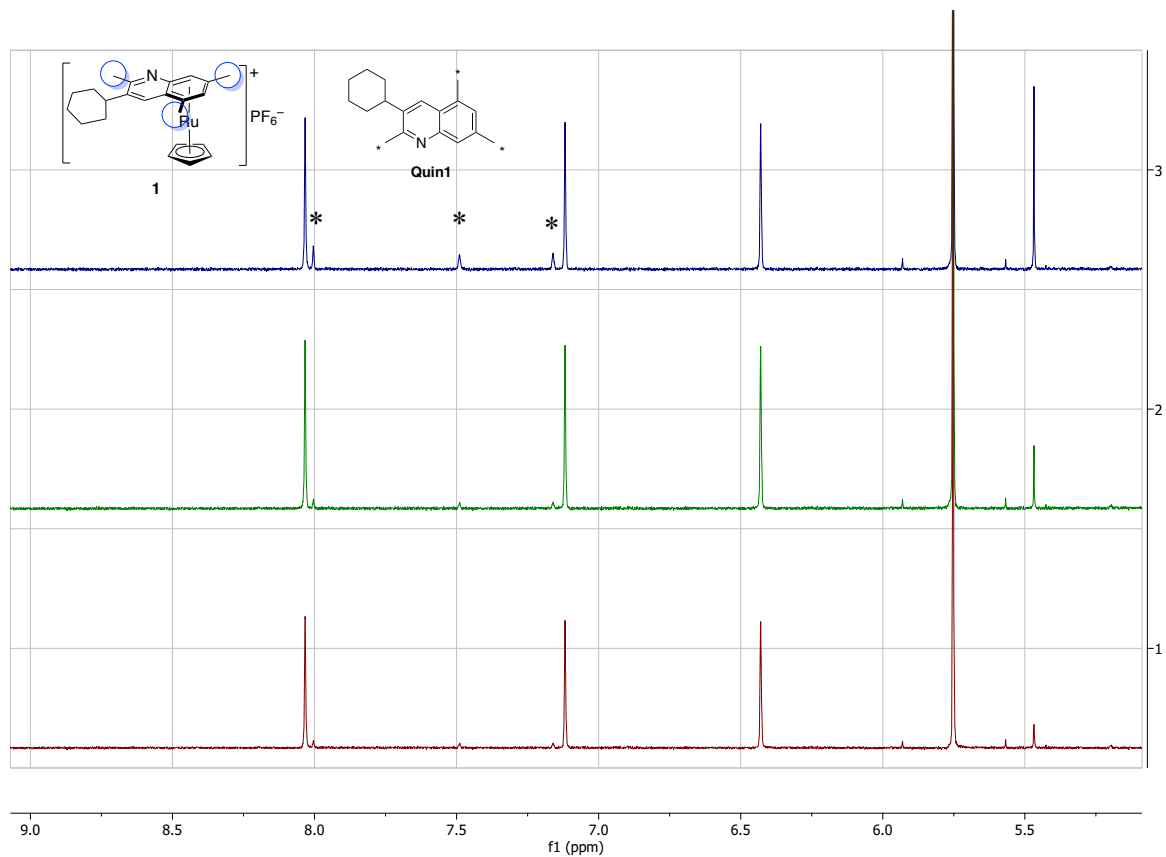

**Fig. 2.** From bottom to top,  $^1\text{H}$  NMR spectra of **1** (aromatic region) in  $\text{DMSO-d}_6$  after 0, 48, and 72 h. Asterisk represents dissociation product Quin 1.

### Stability of **2** in $\text{DMSO-d}_6/\text{D}_2\text{O}$

In a 20 mL glass vial, **2** (3.8 mg) was dissolved in  $\text{DMSO-d}_6$  (60  $\mu\text{L}$ ), which was then diluted with  $\text{D}_2\text{O}$  (540  $\mu\text{L}$ ). The solution was mixed via pipet and transferred to an NMR tube. Proton NMR spectra were taken after 0, 24, 48, and 72 h. No appreciable change was observed in the spectra over this time period.

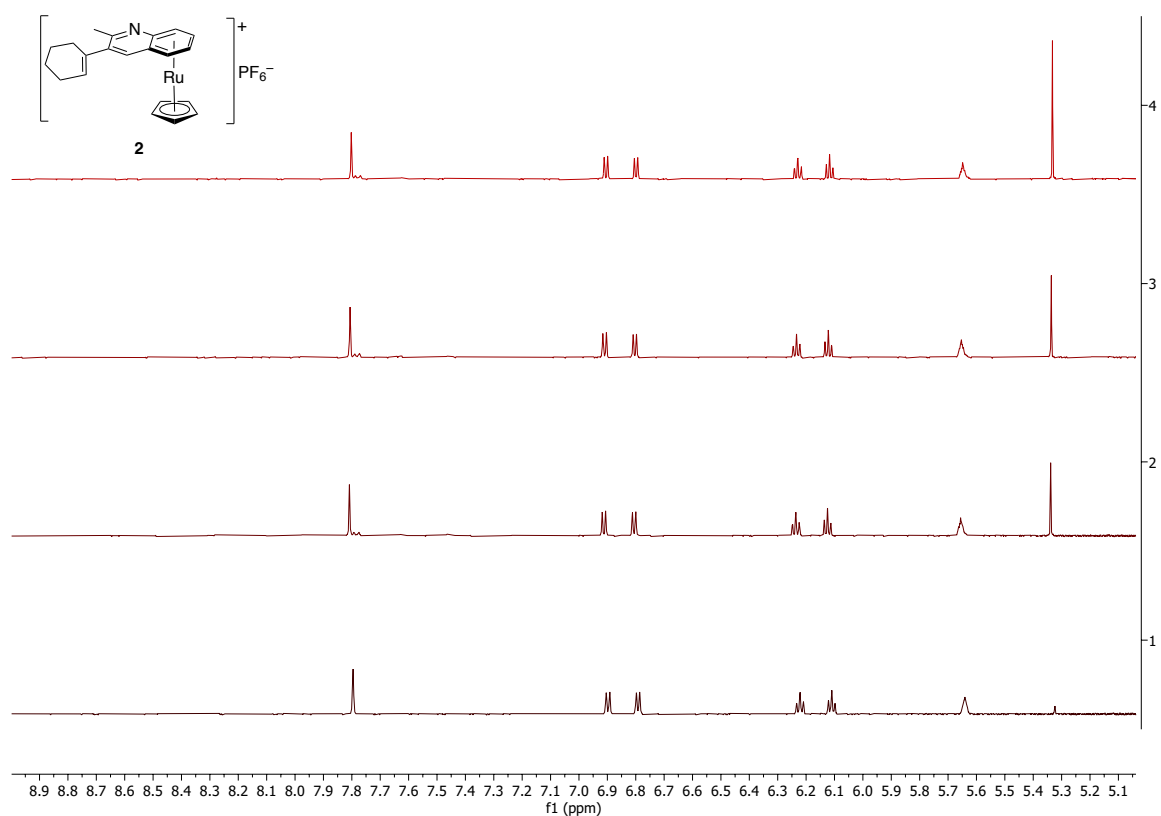

**Fig. 3.** From bottom to top,  $^1\text{H}$  NMR spectra (zoom in 5-9 ppm) of **2** in 10%  $\text{DMSO-d}_6/\text{D}_2\text{O}$  after 0, 24, 48, and 72 h.

#### Stability of $\{\text{RuCp}(\text{NCMe})_3\}^+ \text{PF}_6^-$ in $\text{DMSO-d}_6$

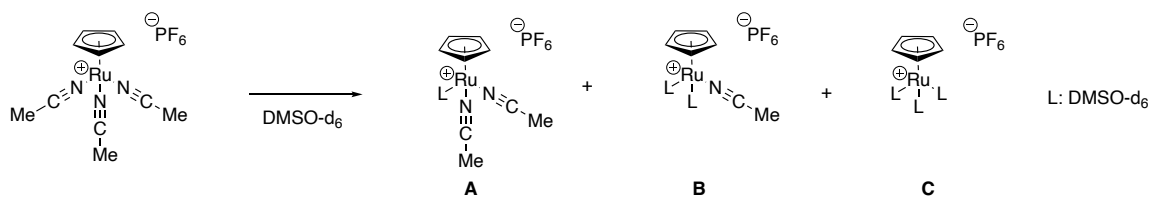

In a 20 mL glass vial,  $\{\text{RuCp}(\text{NCMe})_3\}^+ \text{PF}_6^-$  (1.0 mg) was dissolved in  $\text{DMSO-d}_6$  (600  $\mu\text{L}$ ). The solution was mixed via pipet and transferred to an NMR tube. Proton NMR spectra were taken periodically. According to NMR integration, chemical shifts of products were assigned as following: **A**:  $^1\text{H}$  NMR ( $\text{DMSO-d}_6$ , 500 MHz, 21  $^\circ\text{C}$ ):  $\delta$  4.76 (s, 5H), 2.54 (s, 6H). **B**:  $^1\text{H}$  NMR ( $\text{DMSO-d}_6$ , 500 MHz, 21  $^\circ\text{C}$ ):  $\delta$  5.13 (s, 5H), 2.58 (s, 3H). **C**:  $^1\text{H}$  NMR ( $\text{DMSO-d}_6$ , 500 MHz, 21  $^\circ\text{C}$ ):  $\delta$  5.47 (s, 5H).

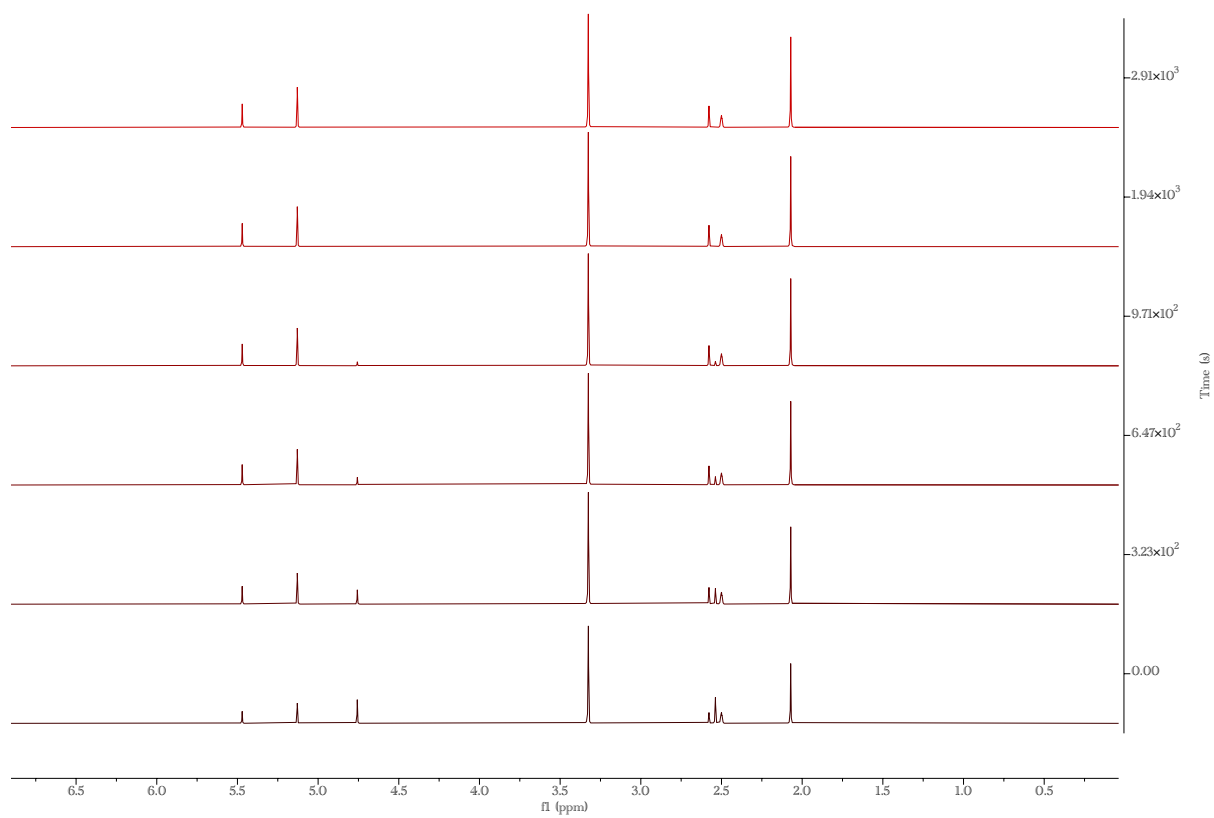

**Fig. 4.** <sup>1</sup>H NMR spectra of {RuCp(NCMe)<sub>3</sub>}<sup>+</sup> PF<sub>6</sub><sup>-</sup> after dissolved in DMSO-d<sub>6</sub> at different times (Y axis).

#### Stability of {RuCp(NCMe)<sub>3</sub>}<sup>+</sup> PF<sub>6</sub><sup>-</sup> in DMSO-d<sub>6</sub>/D<sub>2</sub>O

In a 20 mL glass vial, {RuCp(NCMe)<sub>3</sub>}<sup>+</sup> PF<sub>6</sub><sup>-</sup> (1.1 mg) was dissolved in pre-mixed 10% DMSO-d<sub>6</sub>/D<sub>2</sub>O (600 μL). The solution was mixed via pipet and transferred to an NMR tube. A, B, and C were observed at 0 h. B and C were observed at time 72 h with A having been converted.

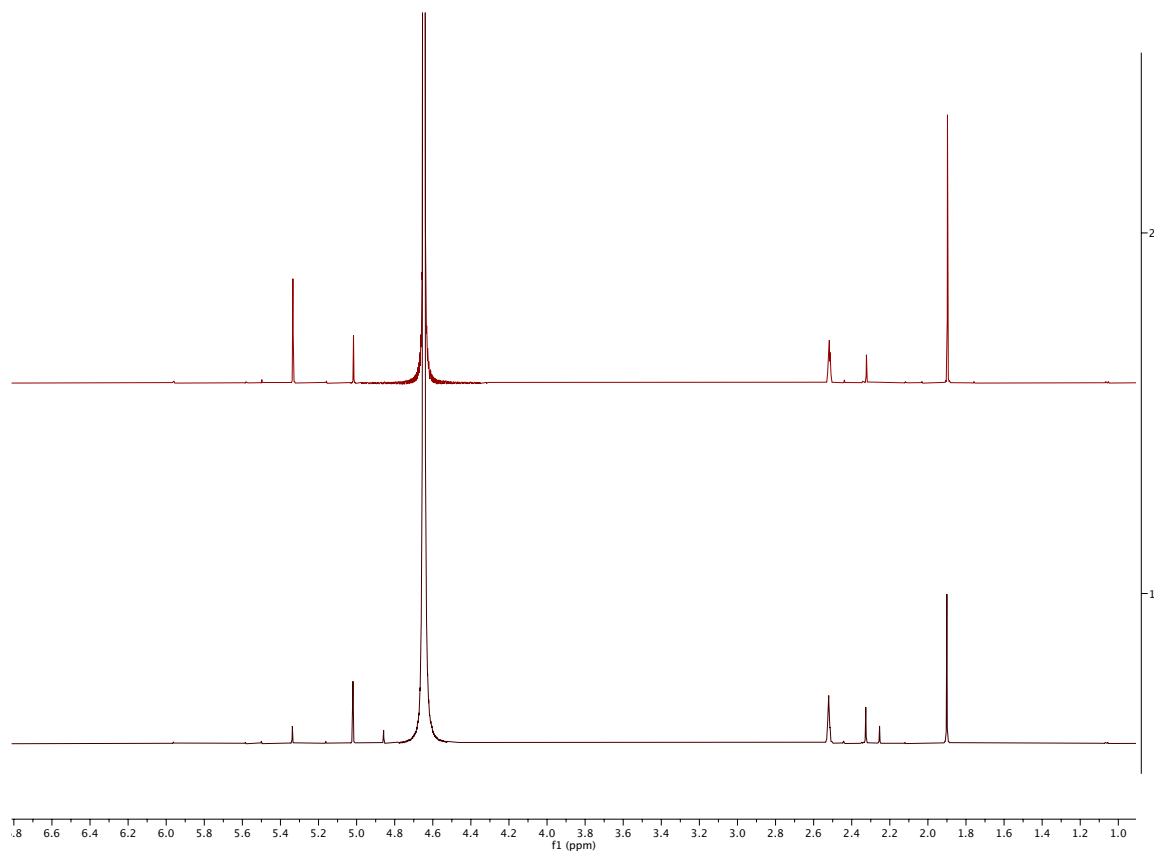

**Fig. 5.** From bottom to top,  $^1\text{H}$  NMR spectra of  $\{\text{RuCp}(\text{NCMe})_3\}^+ \text{PF}_6^-$  in 10%  $\text{DMSO-d}_6/\text{D}_2\text{O}$  after 0 and 72 h.

***Measurement of the kinetics of quinoline replacement by DMSO- $d_6$ :***

In an inert atmosphere glove box, a 20 mL glass vial was loaded **2** (3.1 mg, 5.8  $\mu\text{mol}$ ), ferrocene (3.7 mg, 19.9  $\mu\text{mol}$ ), and  $\text{DMSO-d}_6$  (600  $\mu\text{L}$ ). The solution was mixed by drawing in and out of a pipet until homogeneous. The reaction was transferred into an NMR tube, which was carefully capped and sealed with electrical tape. Then, the NMR tube was removed from the glovebox and placed in room temperature a silicon oil bath. Periodically, an NMR tube was removed from the oil bath, and  $^1\text{H}$  NMR spectra were measured. The relative concentration of **2** vs ferrocene was monitored as a function of time. The fits of the exponential decay of **2** were done using the scientific program KaleidaGraph v5.0.1. The expression used to fit the data was  $Y_t = Y_\infty + (Y_0 - Y_\infty)e^{-k_{\text{obs}}t}$ , where  $Y$  = concentration at time  $t$  ( $Y_t$ ), infinity ( $Y_\infty$ ), or at the start of the reaction ( $Y_0$ ).<sup>2</sup> In the figure,  $m1=Y_\infty$ ,  $m2=Y_0 - Y_\infty$ ,  $m3=k_{\text{obs}}$ .

An example of a plot of concentration vs time and its fit is shown in Fig. 8. The disappearance of **2** has a rate constant of  $4 \times 10^{-4} \text{ s}^{-1}$ , while the appearance of  $\text{CpRu}(\text{DMSO-d}_6)_3^+$  has a rate constant of  $3.8 \times 10^{-4} \text{ s}^{-1}$ . The difference in the starting concentration of **2** versus the ending concentration of  $\text{CpRu}(\text{DMSO-d}_6)_3^+$  likely reflects the creation of some byproduct but none was observed by  $^1\text{H}$  NMR spectroscopy.

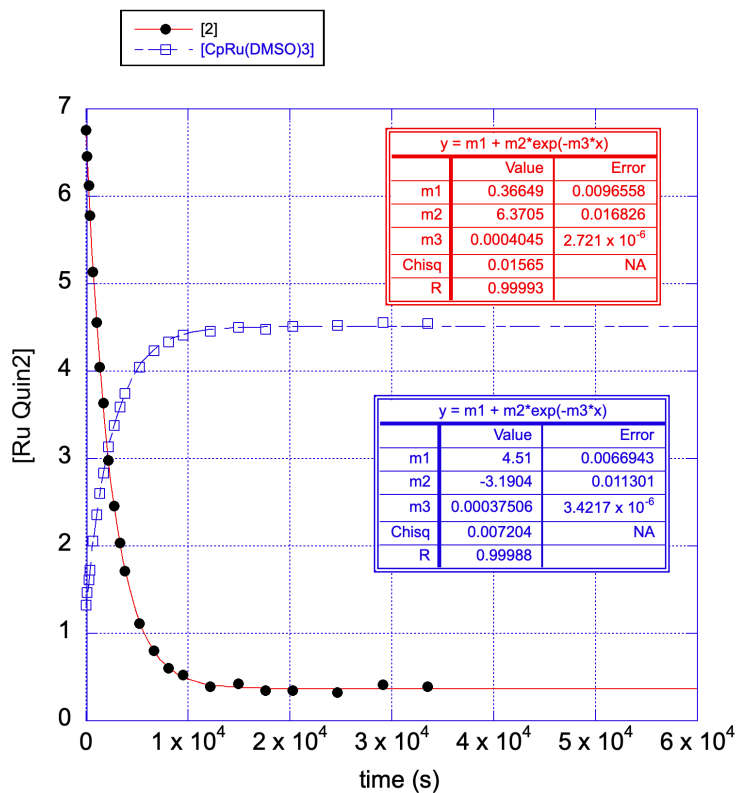

**Fig. 6.** Fit of [2] (block dots) as a function of time (red line) and fit of  $[\text{CpRu}(\text{DMSO-d}_6)_3]^+$  (blue squares) as a function of time (blue line). Concentrations are relative to ferrocene internal standard. See text above for details on the fit.

## NMR Spectra

*( $\eta^6$ (C6)-3-cyclohexyl-2,5,7-trimethylquinoline)( $\eta^5$ -cyclopentadienyl)ruthenium(II) hexafluorophosphate*  
**(1)**  
 $^1\text{H}$  NMR

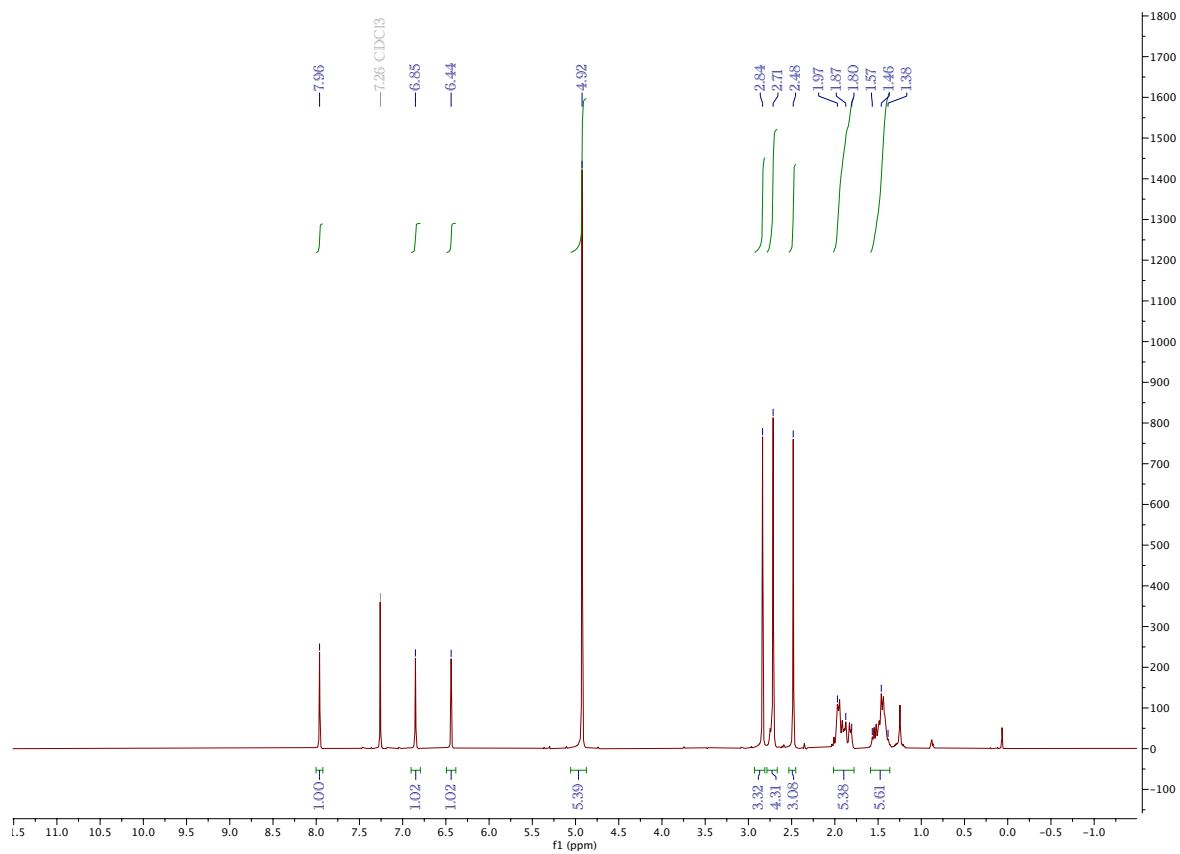

$^{13}\text{C}$  NMR

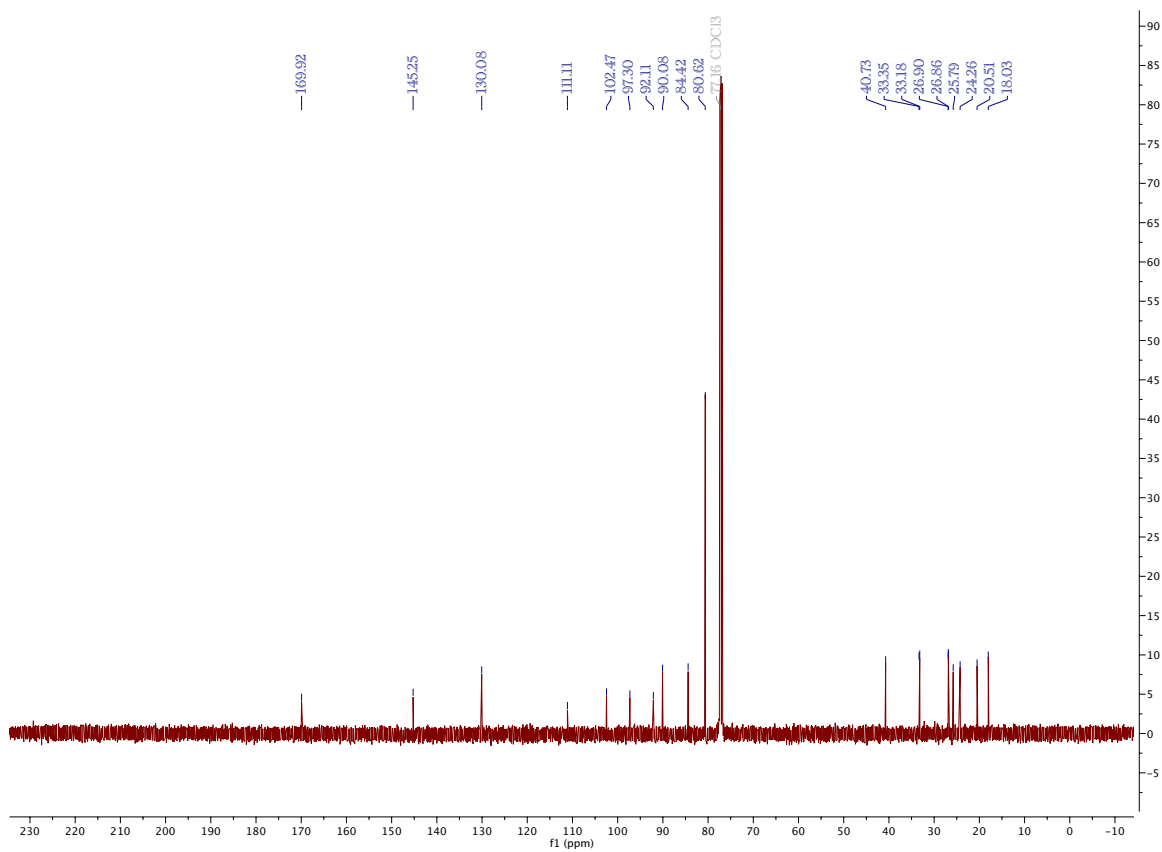

$^{19}\text{F}$  NMR

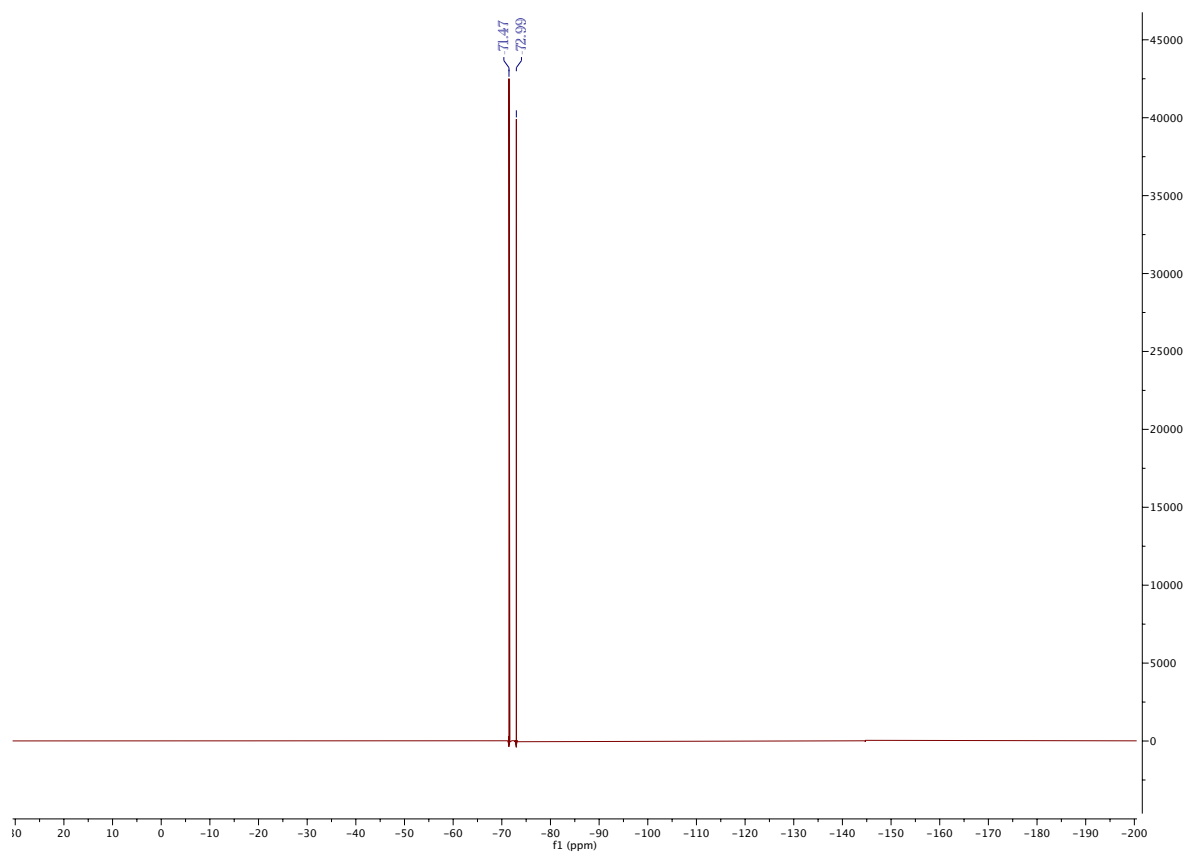

( $\eta^6$ (C6)-3-(cyclohex-1-en-1-yl)-2-methylquinoline)( $\eta^5$ -cyclopentadienyl)ruthenium(II)  
hexafluorophosphate (**2**)

$^1\text{H}$  NMR

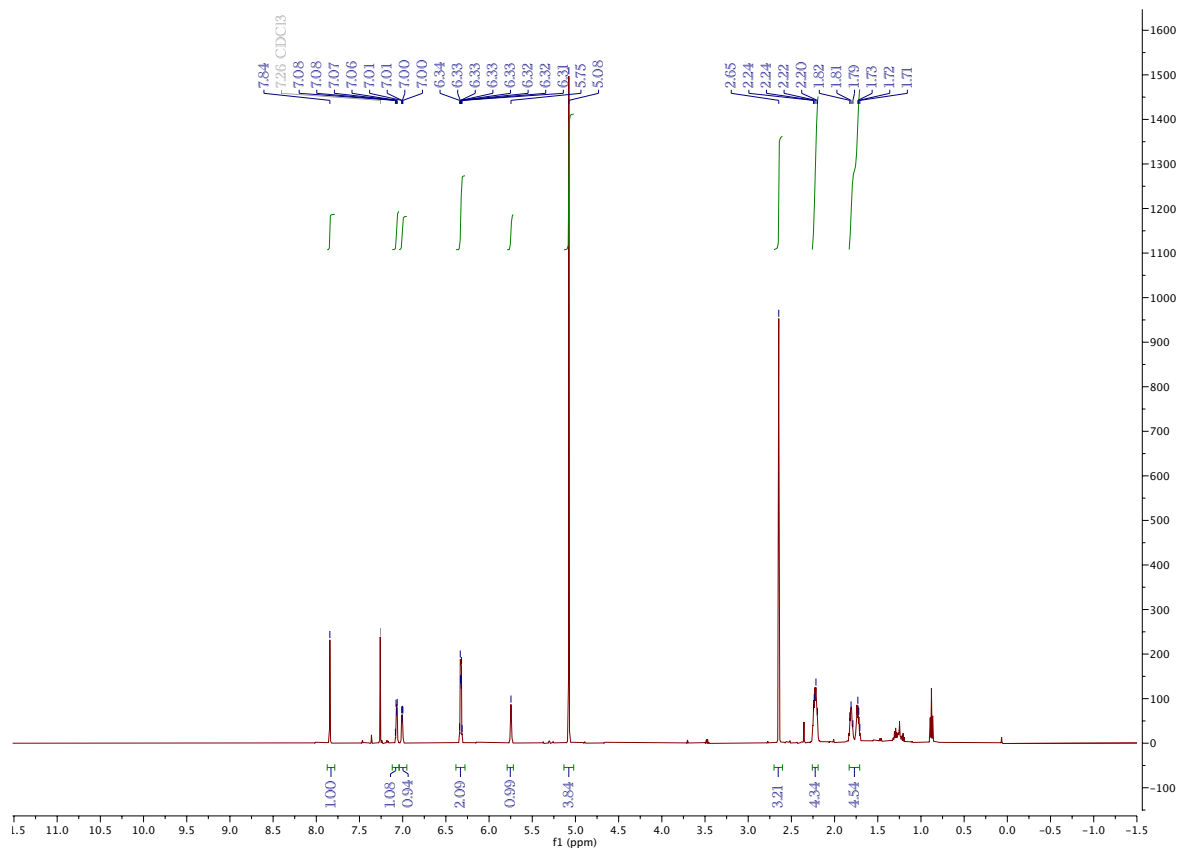

$^{13}\text{C}$  NMR

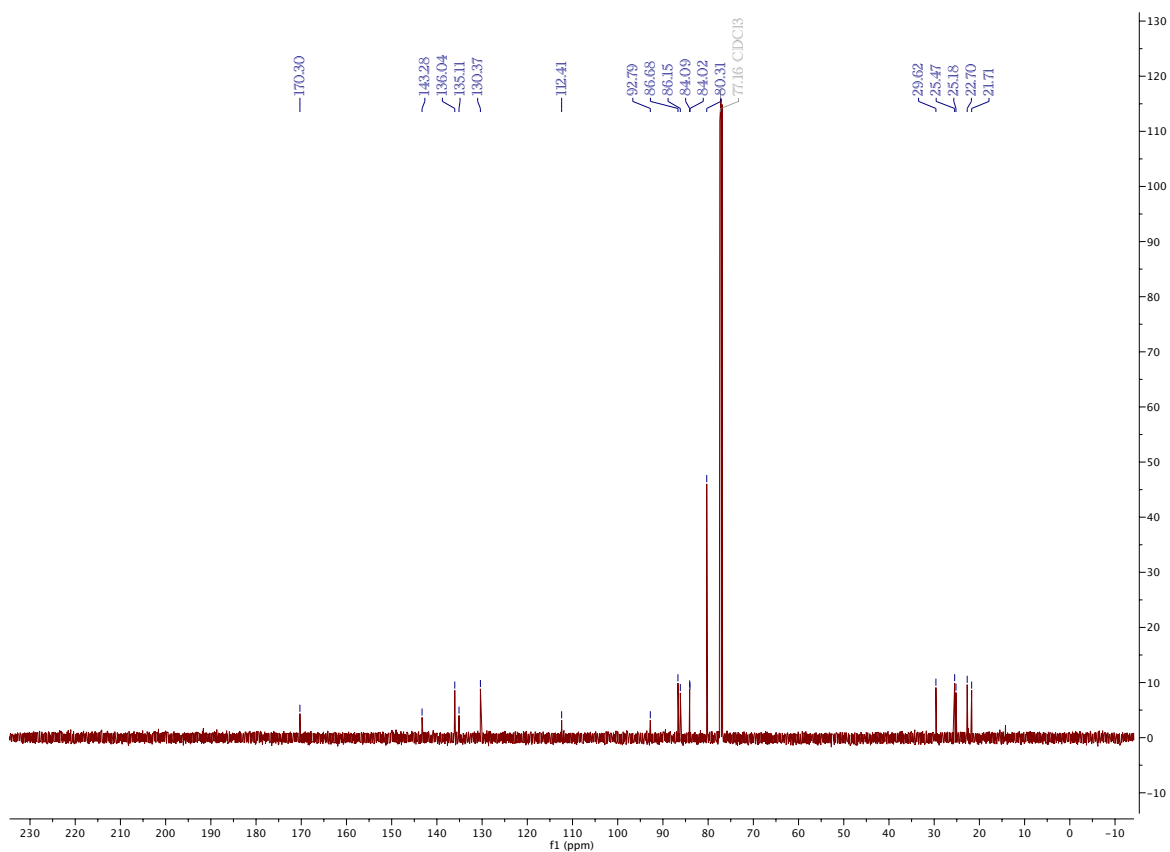

$^{19}\text{F}$  NMR

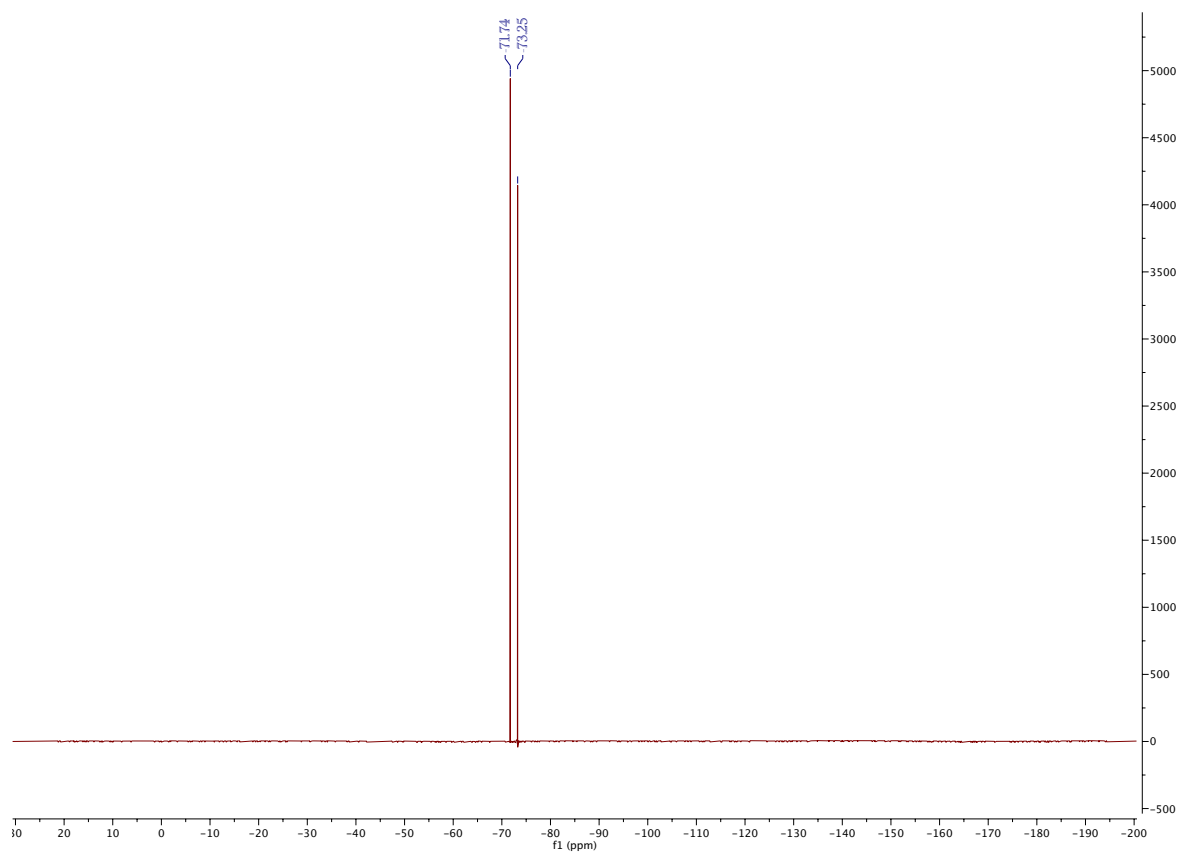

*tris(dimethyl sulfoxide)( $\eta^5$ -cyclopentadienyl)ruthenium(II) hexafluorophosphate*  
 $^1\text{H}$  NMR

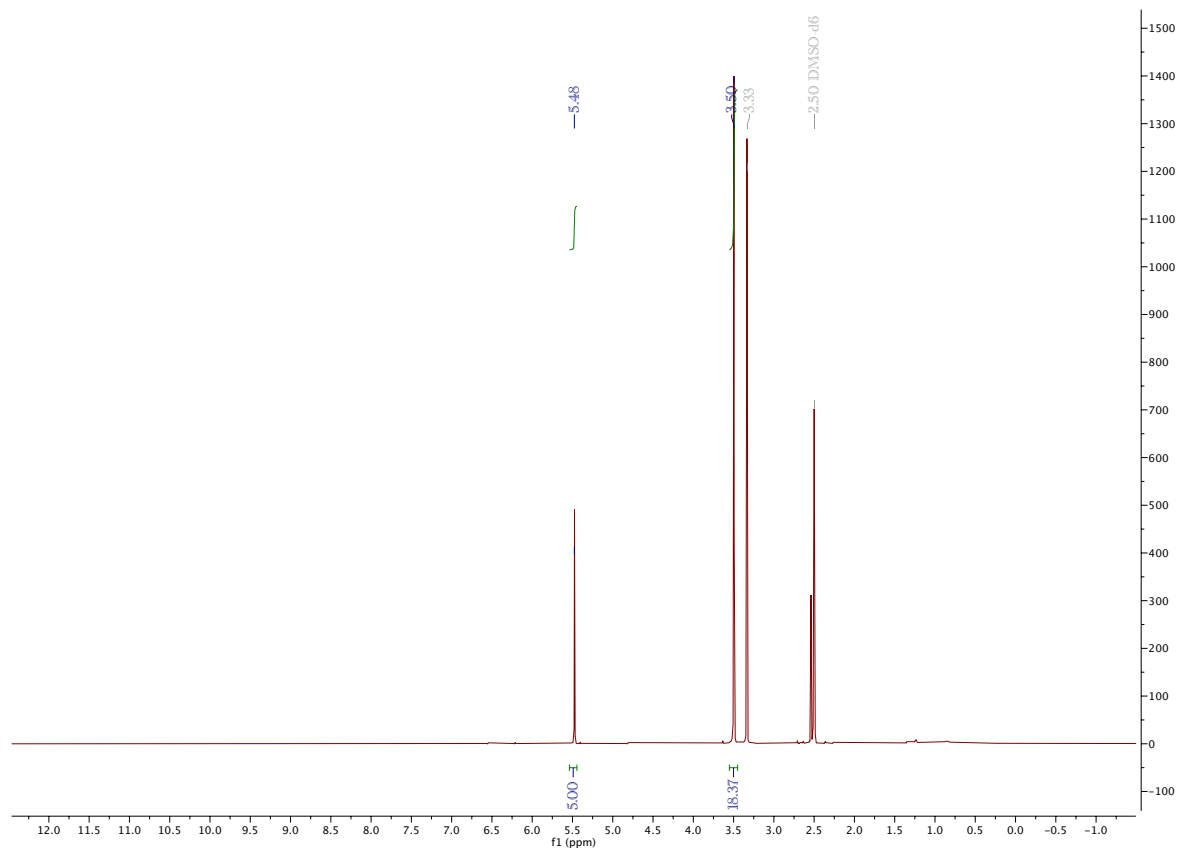

$^{13}\text{C}$  NMR

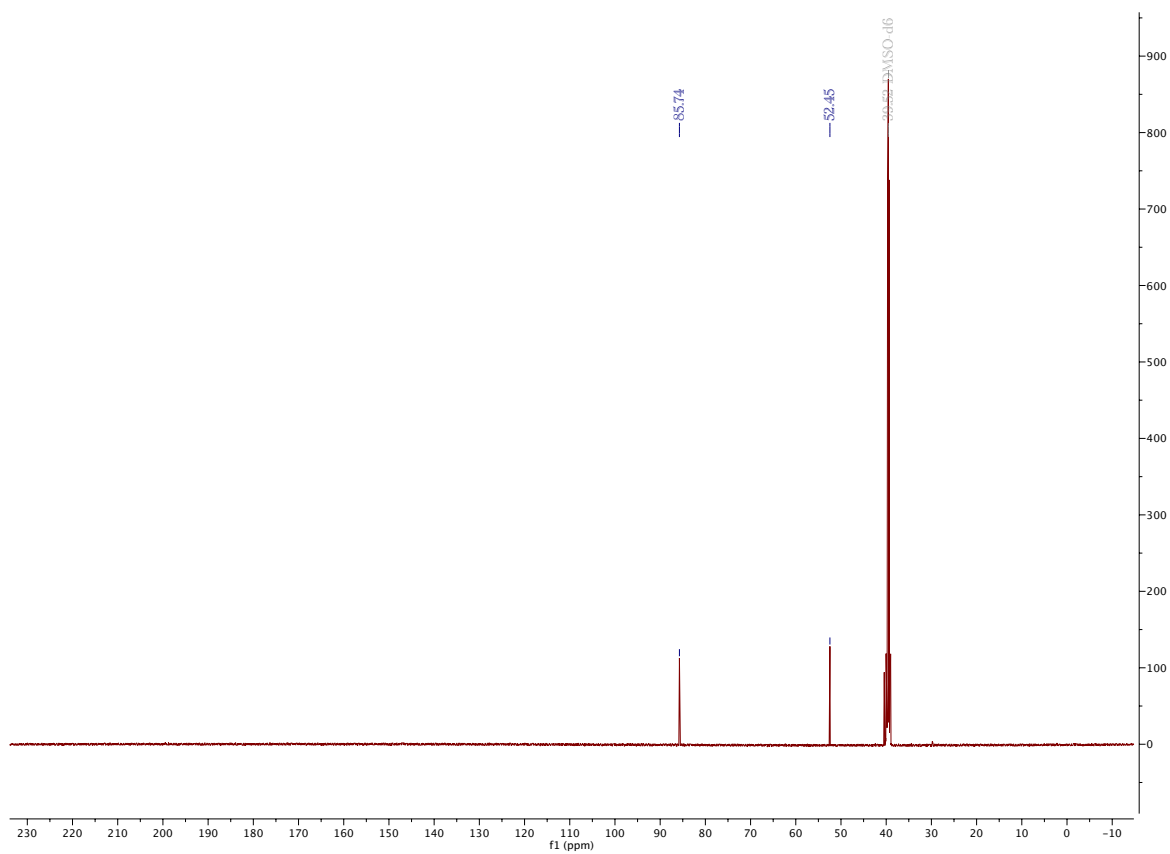

$^{19}\text{F}$  NMR

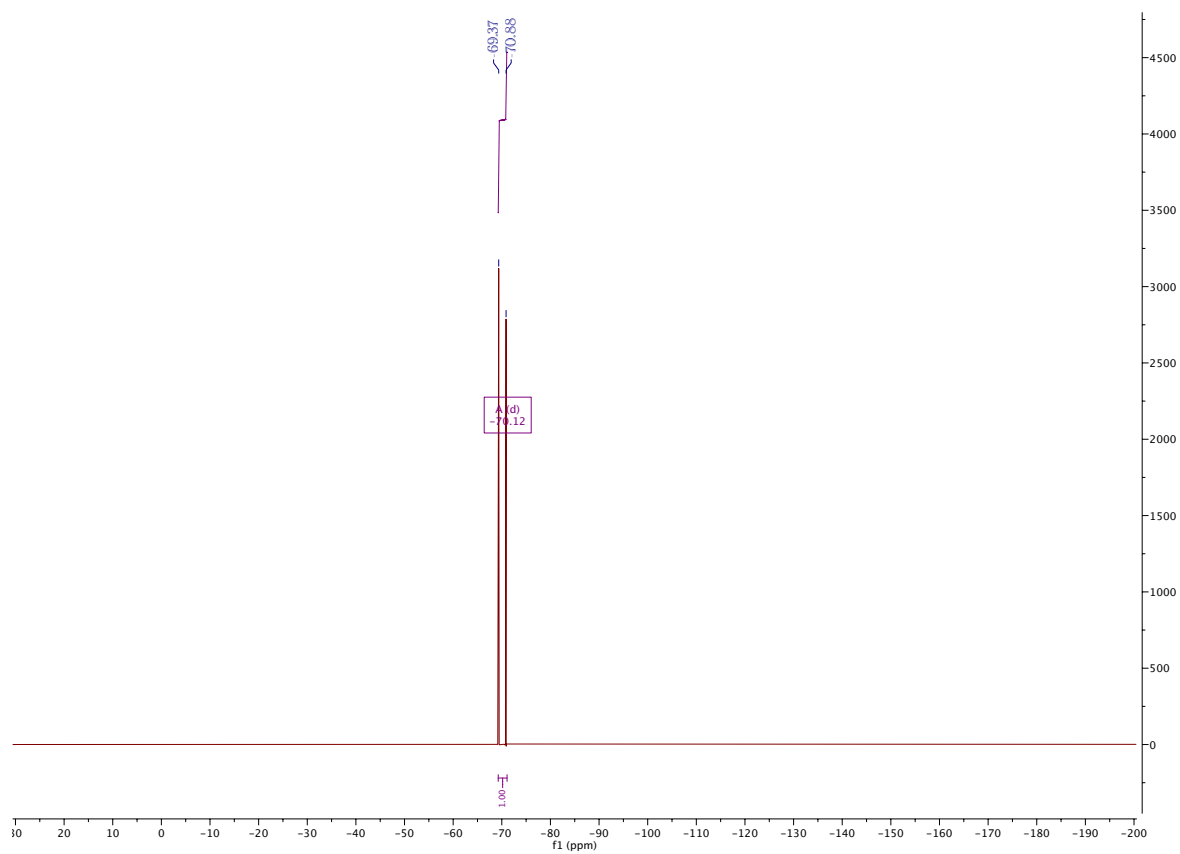

## Cytotoxicity – MC/CAR cells

MC/CAR cells (5,000 cells per well) were seeded in a 96-well plate (100  $\mu$ L volume). The compounds were added for 72 h (0.5% DMSO). Cell Titer Glo assay was used to determine the percent cell viability.

### Percent Viable Cells

|                                      | Vehicle | 1.25 $\mu$ M | 2.5 $\mu$ M | 5 $\mu$ M | 10 $\mu$ M | 20 $\mu$ M | 40 $\mu$ M | CC <sub>50</sub> ( $\mu$ M) |
|--------------------------------------|---------|--------------|-------------|-----------|------------|------------|------------|-----------------------------|
| <b>Quin1</b>                         | 100     | 102          | 95          | 94        | 72         | 51         | 23         | <b>19.5</b>                 |
| <b>1</b>                             | 100     | 80           | 61          | 41        | 20         | 6          | 1          | <b>3.4</b>                  |
| <b>2</b>                             | 100     | 90           | 75          | 67        | 37         | 5          | 1          | <b>6.8</b>                  |
| <b>Quin2</b>                         | 100     | 124          | 125         | 114       | 98         | 85         | 61         | <b>&gt;40.0</b>             |
| CpRu(DMSO) <sub>3</sub> <sup>+</sup> | 100     | 63           | 55          | 41        | 31         | 15         | 4          | <b>2.8</b>                  |

(n = 4)

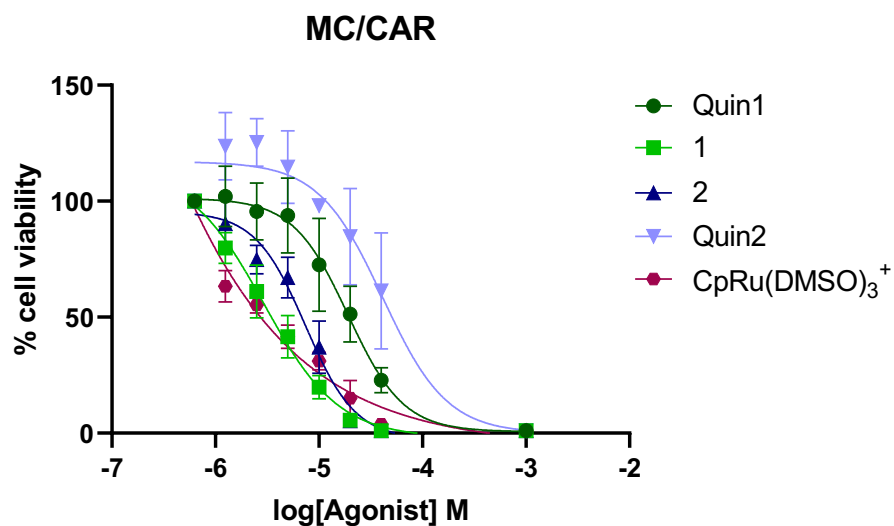

## Cytotoxicity – RPMI 8226 cells

RPMI 8226 cells (25,000 cells per well) were seeded in a 96-well plate (100  $\mu$ L volume). Cell Titer Glo assay was used to determine the percent cell viability.

### Percent Viable Cells

|                                      | Vehicle | 1.25 $\mu$ M | 2.5 $\mu$ M | 5 $\mu$ M | 10 $\mu$ M | 20 $\mu$ M | 40 $\mu$ M | CC <sub>50</sub> ( $\mu$ M) |
|--------------------------------------|---------|--------------|-------------|-----------|------------|------------|------------|-----------------------------|
| <b>Quin1</b>                         | 100     | 91           | 88          | 80        | 56         | 33         | 11         | <b>11.8</b>                 |
| <b>1</b>                             | 100     | 77           | 38          | 16        | 7          | 3          | 1          | <b>2.0</b>                  |
| <b>2</b>                             | 100     | 105          | 96          | 50        | 5          | 1          | 1          | <b>5.0</b>                  |
| <b>Quin2</b>                         | 100     | 121          | 116         | 115       | 107        | 72         | 43         | <b>32.4</b>                 |
| CpRu(DMSO) <sub>3</sub> <sup>+</sup> | 100     | 97           | 103         | 109       | 110        | 106        | 92         | <b>&gt;40.0</b>             |

(n = 4)

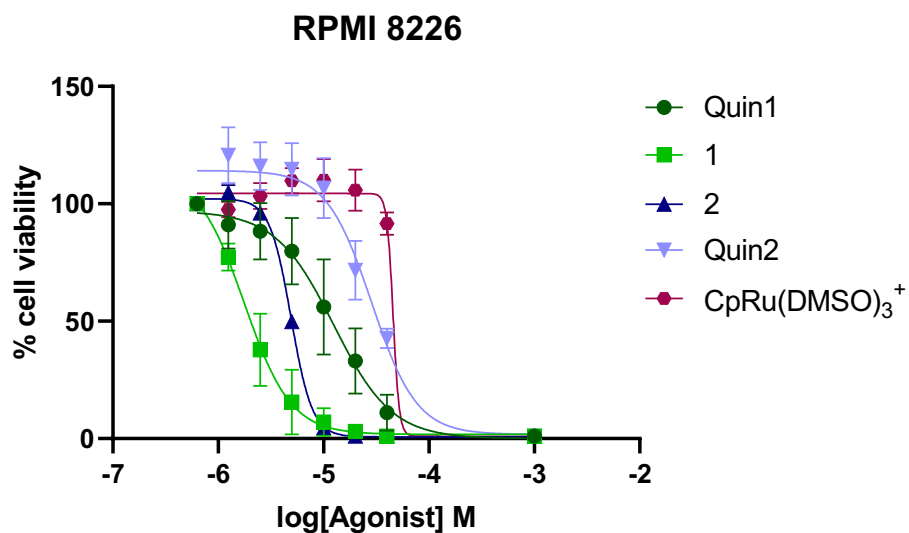

20S Proteasome Inhibitor Data for Quin1

% 20S proteasome activity

|         | Vehicle | 1.25 $\mu$ M | 2.5 $\mu$ M | 5 $\mu$ M | 10 $\mu$ M | 20 $\mu$ M | 40 $\mu$ M | 80 $\mu$ M | IC <sub>50</sub> ( $\mu$ M) |
|---------|---------|--------------|-------------|-----------|------------|------------|------------|------------|-----------------------------|
| 3 Sites | 100     | 106          | 101         | 87        | 62         | 38         | 22         | 15         | 13.9                        |
| CT-L    | 100     | 110          | 106         | 84        | 39         | 8          | 2          | 1          | 8.5                         |
| Casp-L  | 100     | 108          | 104         | 85        | 45         | 16         | 5          | 2          | 9.4                         |
| T-L     | 100     | 88           | 75          | 78        | 95         | 105        | 129        | 135        | >80.0                       |

(n = 3)

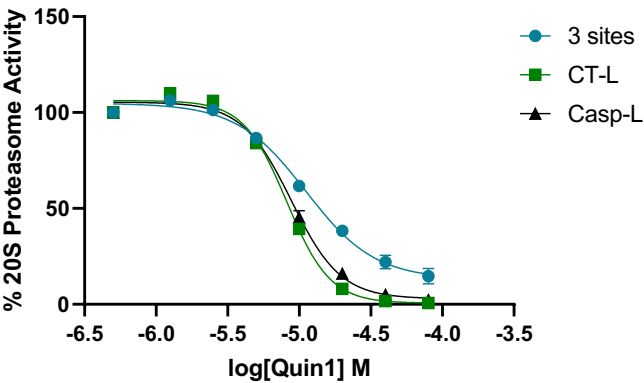

20S Proteasome Inhibitor Data for 1

% 20S proteasome activity

|         | Vehicle | 1.25 $\mu$ M | 2.5 $\mu$ M | 5 $\mu$ M | 10 $\mu$ M | 20 $\mu$ M | 40 $\mu$ M | 80 $\mu$ M | IC <sub>50</sub> ( $\mu$ M) |
|---------|---------|--------------|-------------|-----------|------------|------------|------------|------------|-----------------------------|
| 3 Sites | 100     | 108          | 105         | 99        | 85         | 63         | 41         | 36         | 29.7                        |
| CT-L    | 100     | 115          | 114         | 105       | 78         | 35         | 8          | 3          | 15.4                        |
| Casp-L  | 100     | 108          | 105         | 96        | 71         | 41         | 20         | 13         | 16.0                        |
| T-L     | 100     | 100          | 93          | 91        | 88         | 85         | 91         | 87         | >80.0                       |

(n = 3)

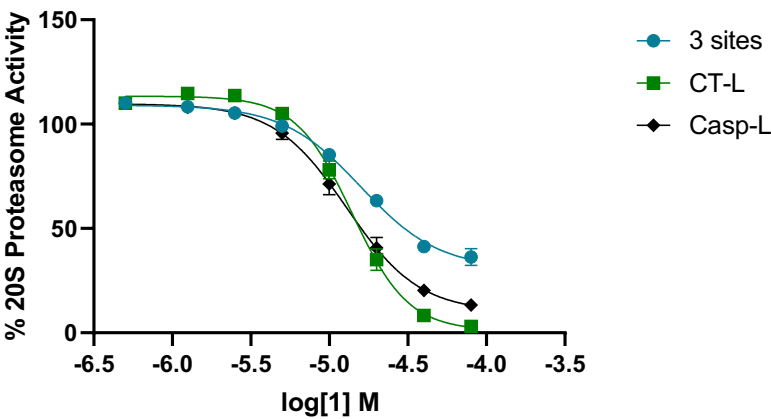

20S Proteasome Inhibitor Data for Quin2

% 20S proteasome activity

|         | Vehicle | 1.25 $\mu$ M | 2.5 $\mu$ M | 5 $\mu$ M | 10 $\mu$ M | 20 $\mu$ M | 40 $\mu$ M | 80 $\mu$ M | IC <sub>50</sub> ( $\mu$ M) |
|---------|---------|--------------|-------------|-----------|------------|------------|------------|------------|-----------------------------|
| 3 Sites | 100     | 94           | 87          | 91        | 89         | 84         | 75         | 67         | >80.0                       |
| CT-L    | 100     | 106          | 107         | 110       | 113        | 116        | 109        | 95         | >80.0                       |
| Casp-L  | 100     | 96           | 102         | 100       | 97         | 103        | 98         | 91         | >80.0                       |
| T-L     | 100     | 89           | 95          | 87        | 90         | 104        | 109        | 121        | >80.0                       |

(n = 3)

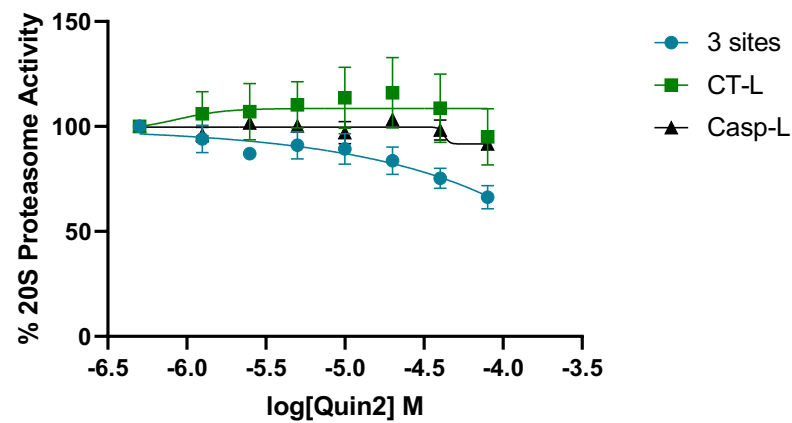

20S Proteasome Inhibitor Data for 2

% 20S proteasome activity

|         | Vehicle | 1.25 $\mu$ M | 2.5 $\mu$ M | 5 $\mu$ M | 10 $\mu$ M | 20 $\mu$ M | 40 $\mu$ M | 80 $\mu$ M | IC <sub>50</sub> ( $\mu$ M) |
|---------|---------|--------------|-------------|-----------|------------|------------|------------|------------|-----------------------------|
| 3 Sites | 100     | 87           | 90          | 88        | 83         | 81         | 67         | 56         | >80.0                       |
| CT-L    | 100     | 104          | 108         | 109       | 111        | 108        | 91         | 68         | >80.0                       |
| Casp-L  | 100     | 98           | 99          | 97        | 100        | 98         | 86         | 74         | >80.0                       |
| T-L     | 100     | 91           | 80          | 83        | 87         | 88         | 100        | 116        | >80.0                       |

(n = 3)

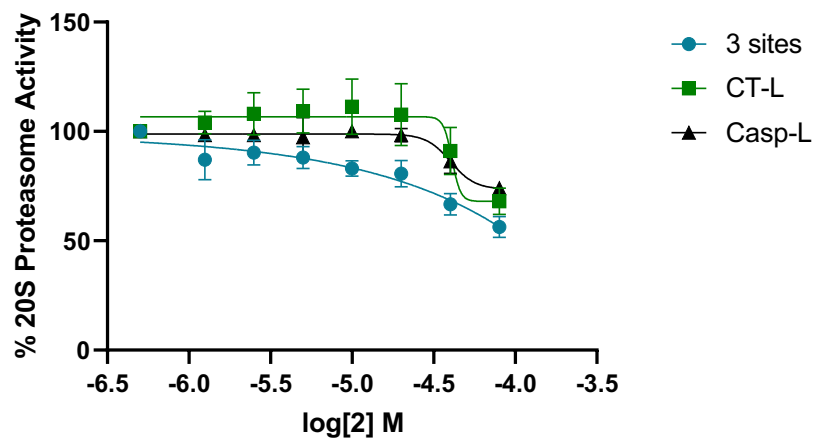

## Cellular Proteasome Activity Assay

RPMI 8226 cells (10,000 cells per well) were seeded in a 96-well plate (100  $\mu$ L volume). Cells were treated with DMSO, 3 or 5  $\mu$ M test compound, or 3 nM BTZ for 24 hours. Proteasome-Glo cell-based (CT-L site) activity assay was used to measure proteasome activity. Cell Titer Glo assay was run in parallel to determine the percent cell viability at this treatment time.

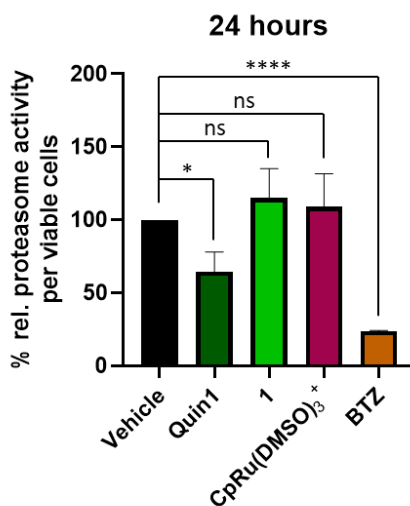

|                                                | Percent Proteasome Activity | Percent Cell Viability | Percent Relative Proteasome Activity per Viable Cells |
|------------------------------------------------|-----------------------------|------------------------|-------------------------------------------------------|
| Vehicle                                        | 100                         | 100                    | 100                                                   |
| 5 $\mu$ M Quin1                                | 56                          | 87                     | 64                                                    |
| 3 $\mu$ M 1                                    | 69                          | 60                     | 115                                                   |
| 3 $\mu$ M CpRu(DMSO) <sub>3</sub> <sup>+</sup> | 96                          | 89                     | 109                                                   |
| 3 nM BTZ                                       | 22                          | 95                     | 24                                                    |

(n=3)

## DNA Crosslinking Assay

Plasmid pBR322 was linearized with *Eco*R1 for 1 h at 37 °C. Linearized DNA (250 µg) was incubated with DMSO or 50 µM drug for 16 h at 37 °C. An alkaline agarose gel was prepared using 20 mL of buffer (50 mM NaCl, 2 mM EDTA pH 8.0) and 0.2 g of agarose. The suspension was heated in a microwave for 45 seconds to dissolve, then 2 µL of GelGreen stain was added. The gel was poured and allowed to cool at room temperature and then soaked in alkaline running buffer (25 mL of 2 N NaOH, 2 mL of 0.5 M EDTA in 1 L of H<sub>2</sub>O) for 1 h. The samples were then loaded into the wells with loading dye (5 µL) and the gel was run at 4 °C for 1.5 h. Gel was visualized on an Azure Biosystems Imager (green LED/orange filter).

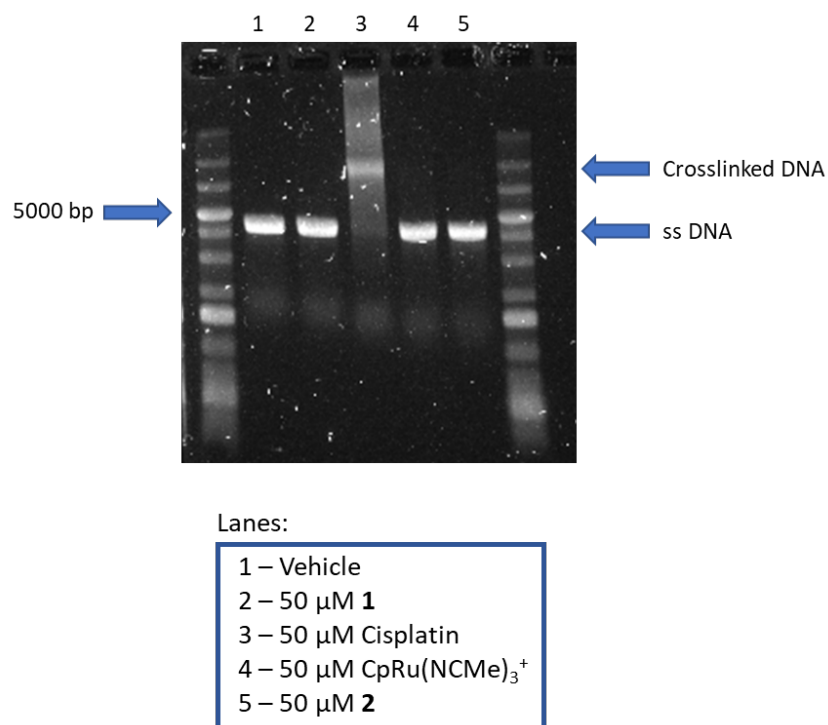

## Cited References

1. Gill, T. P.; Mann, K. R., Photochemical properties of the cyclopentadienyl(η<sup>6</sup>-benzene)ruthenium(II) cation - the synthesis and reactions of a synthetically useful intermediate - the cyclopentadienyltris(acetonitrile)ruthenium(II) cation *Organometallics* **1982**, *1*, 485-488.
2. Espenson, J. H., *Chemical kinetics and reaction mechanisms* 2nd Edition ed.; McGraw Hill: New York, 2002.
